# Supplementary material for: The luminescence properties of CsPbxM1−xBr3 perovskite nanocrystals transformed from Cs4PbBr6 mediated by various divalent bromide MBr2 salts
Source: Royal Society of Chemistry journal article supplement (doi:10.1039/c8nr09845j), 2019-01-01
Supplement: c8nr09845j1.pdf [file c8nr09845j1.pdf]

## Supporting Information

### The Luminescence Property of $\text{CsPb}_x\text{M}_{1-x}\text{Br}_3$ Perovskite Nanocrystals Transformed from $\text{Cs}_4\text{PbBr}_6$ Mediated by Various Divalent Bromide $\text{MBr}_2$ Salts

Zhaohui Shen,<sup>ab</sup> Bo Qiao,<sup>ab</sup> Zheng Xu,<sup>ab</sup> Dandan Song,<sup>ab</sup> Di Gao,<sup>ab</sup> Pengjie Song,<sup>ab</sup> Jingyue Cao<sup>ab</sup> and Qiongyu Bai<sup>ab</sup>, Yuanchun Wu<sup>c</sup>, Suling Zhao,<sup>\*ab</sup>

<sup>a</sup>Key Laboratory of Luminescence and Optical Information (Beijing Jiaotong University), Ministry of Education, Beijing 100044, China

<sup>b</sup>Institute of Optoelectronics Technology, Beijing Jiaotong University, Beijing 100044, China

<sup>c</sup>Shenzhen China Star Optoelectronics Technology Co., Ltd., Shenzhen, 518132, China

#### PL decay lifetime

The PL decay curve were fitted with a triexponential function

$$A(t) = A_1 \exp\left(-\frac{t}{\tau_1}\right) + A_2 \exp\left(-\frac{t}{\tau_2}\right) + A_3 \exp\left(-\frac{t}{\tau_3}\right)$$

where  $A_1$ ,  $A_2$ , and  $A_3$  are time independent coefficient constants, and  $t$  is time.  $\tau_1$ ,  $\tau_2$ , and  $\tau_3$  are decay lifetimes because of the intrinsic exciton relaxation, the interaction between excitons and phonons, and the interaction between excitons and defects, respectively.

$\tau_{ave}$ , the average lifetime, can be calculated with a function

$$\tau_{ave} = \frac{A_1\tau_1^2 + A_2\tau_2^2 + A_3\tau_3^2}{A_1\tau_1 + A_2\tau_2 + A_3\tau_3}$$

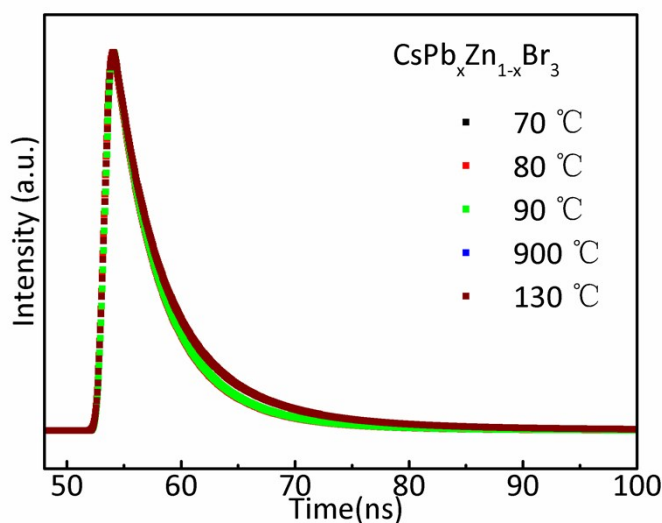

Figure S2. PL decay curves of  $\text{CsPb}_x\text{Zn}_{1-x}\text{Br}_3$  NCs synthesized at different temperature.

Table 1. Fluorescence lifetimes of CsPb<sub>x</sub>Zn<sub>1-x</sub>Br<sub>3</sub> NCs.

| Temperature      | 70°C | 80°C | 90°C | 100°C | 130°C |
|------------------|------|------|------|-------|-------|
| Average Time(ns) | 5.04 | 4.79 | 4.33 | 4.31  | 4.70  |

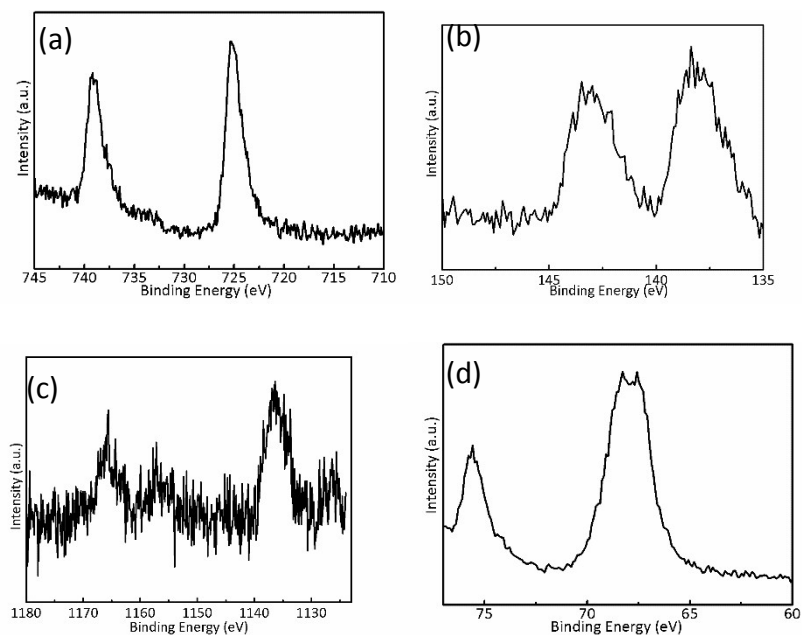

Figure S2. XPS spectra for CsPb<sub>x</sub>Eu<sub>1-x</sub>Br<sub>3</sub> NCs. (a–d) The high-resolution XPS analysis corresponding to Cs 3d, Pb 4f, Eu 3d and Br 3d, respectively.

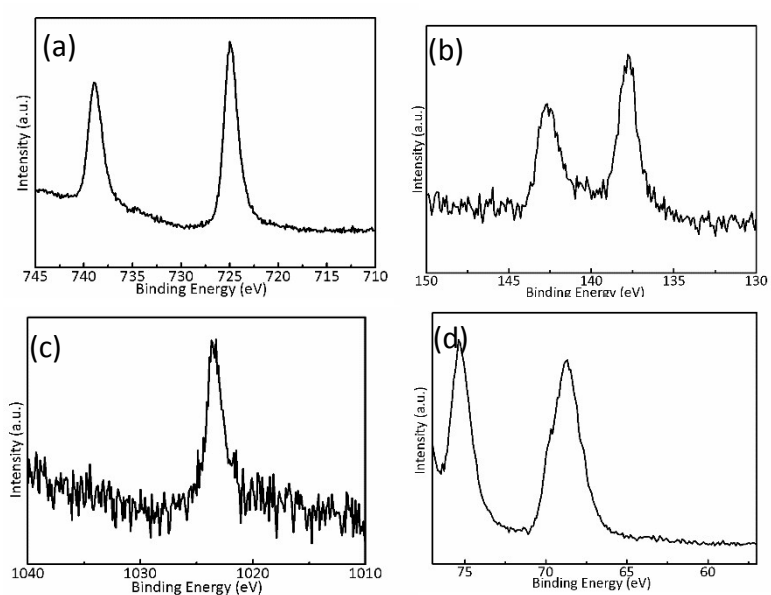

Figure S3. XPS spectra for CsPb<sub>x</sub>Zn<sub>1-x</sub>Br<sub>3</sub> NCs. (a–d) The high-resolution XPS analysis corresponding to Cs 3d, Pb 4f, Zn 2p and Br 3d, respectively.

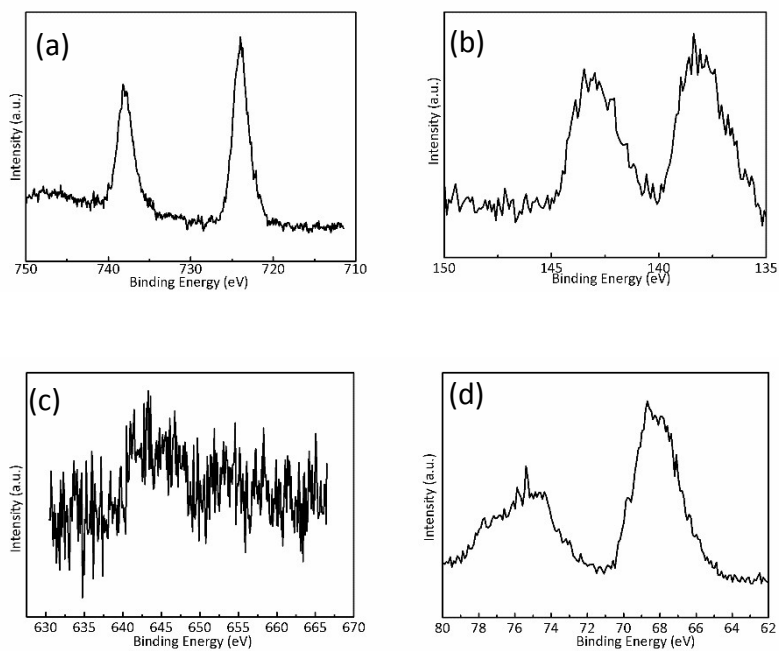

Figure S4. XPS spectra for  $\text{CsPb}_x\text{Mn}_{1-x}\text{Br}_3$  NCs. (a–d) The high-resolution XPS analysis corresponding to Cs 3d, Pb 4f, Mn 2p and Br 3d, respectively.

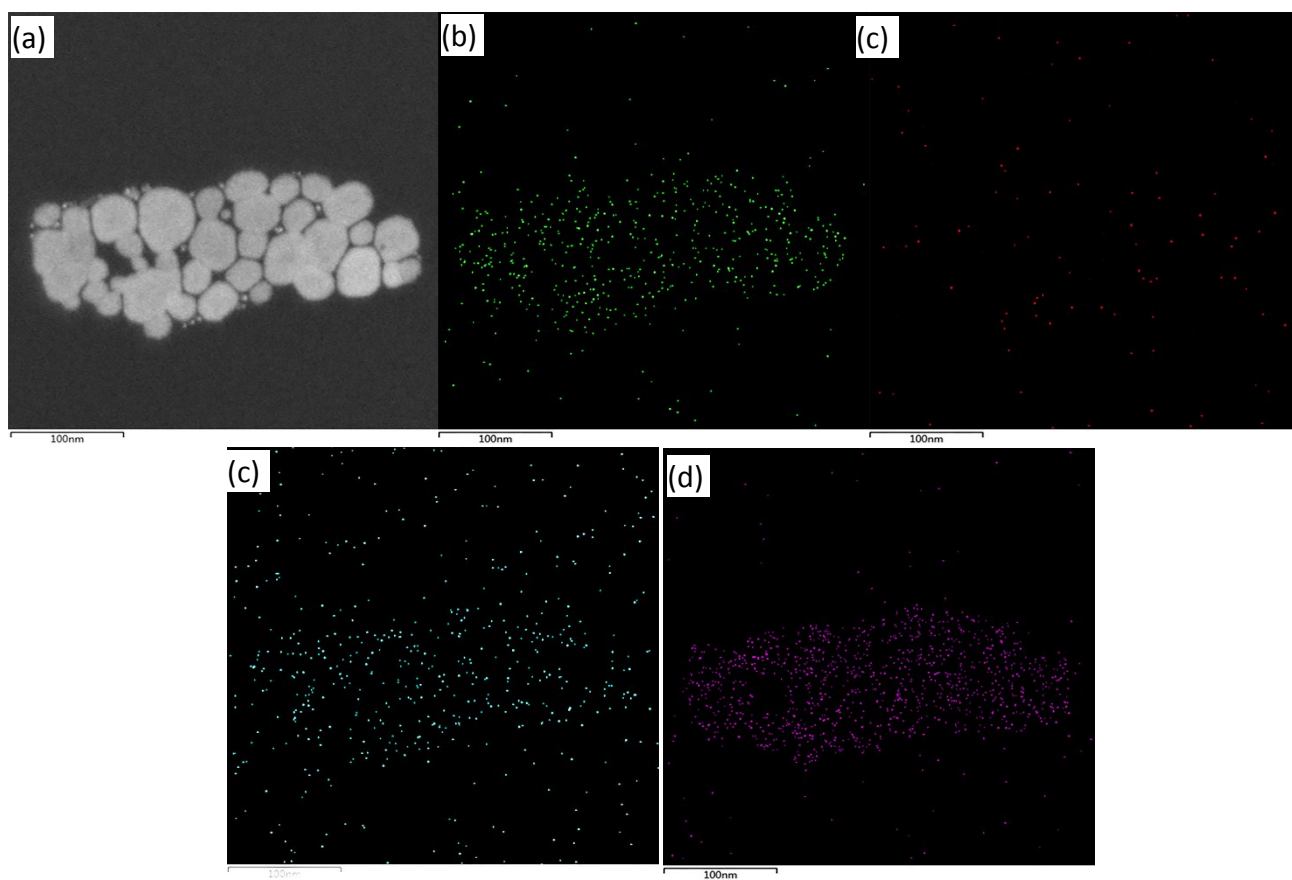

Figure S5. EDS element mapping images of  $\text{CsPb}_x\text{Zn}_{1-x}\text{Br}_3$  NCs. (a–e) images of Cs, Pb, Zn and Br.

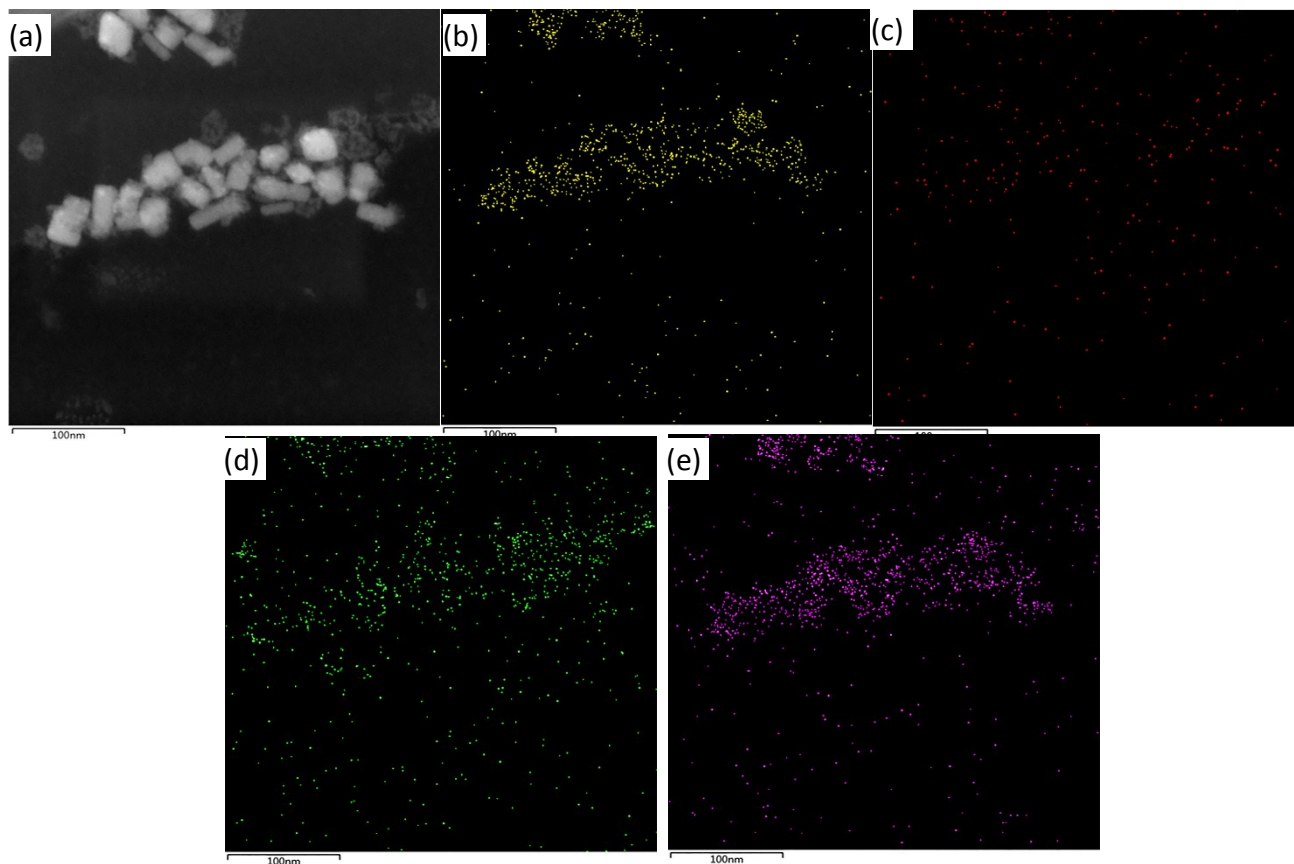

Figure S6. EDS element mapping images of CsPb<sub>x</sub>Mn<sub>1-x</sub>Br<sub>3</sub> NCs. (a-e) images of Cs, Pb, Mn and Br.

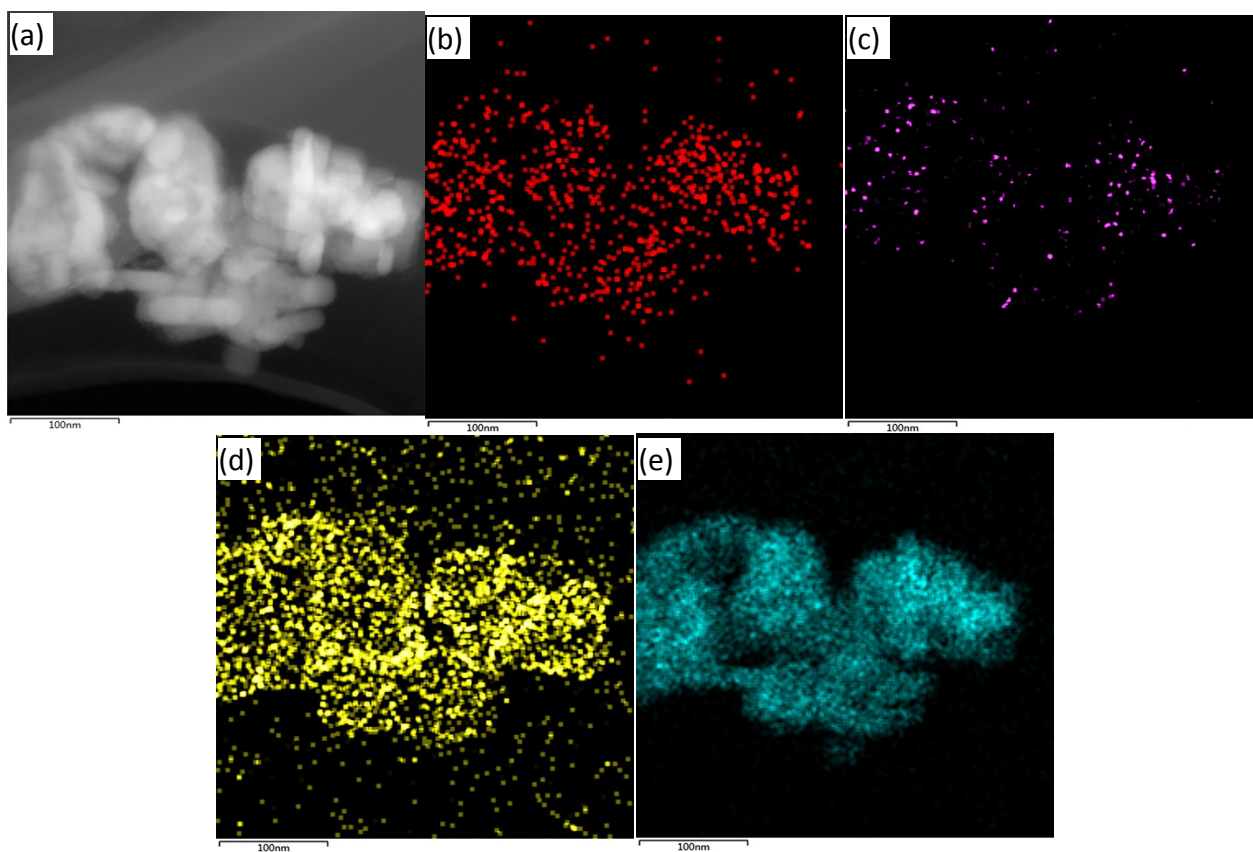

Figure S7. EDS element mapping images of CsPb<sub>x</sub>Eu<sub>1-x</sub>Br<sub>3</sub> NCs. (a-e) images of Cs, Pb, Eu and Br.

Table S2. Substitution rates for lead ions in CsPb<sub>x</sub>M<sub>1-x</sub>Br<sub>3</sub> NCs

|                                                     | Cs <sup>+</sup> (%) | Pb <sup>2+</sup> (%) | M <sup>2+</sup> (%) | Br <sup>-</sup> (%) | M <sup>2+</sup> / (Pb <sup>2+</sup> +M <sup>2+</sup> ) (%) |
|-----------------------------------------------------|---------------------|----------------------|---------------------|---------------------|------------------------------------------------------------|
| CsPb <sub>x</sub> Mn <sub>1-x</sub> Br <sub>3</sub> | 1.99                | 0.51                 | 1.57                | 8.9                 | 75.48                                                      |
| CsPb <sub>x</sub> Eu <sub>1-x</sub> Br <sub>3</sub> | 12.09               | 6.61                 | 7.04                | 7.16                | 51.58                                                      |
| CsPb <sub>x</sub> Zn <sub>1-x</sub> Br <sub>3</sub> | 3.17                | 0.45                 | 1.94                | 12.57               | 81.17                                                      |
